# Supplementary material
Source: Elsevier journal article supplement (https://www.sciencedirect.com/science/article/pii/S0210480617301687)
Supplement: mmc1 [file S0210480617301687:mmc1.pdf]

# Guide SmartGlass program

This guide will help you to make the most of your experience as a participant, suggesting possible scenarios of your daily practice in which you could use the SmartGlass.

Additionally, you will find space to note down your observations, as well as a short survey which will help us to gather as much information as possible.

SmartGlass number:

## Surgery room

**The SmartGlass could be eventually used in the following situations during a surgical intervention:**

- a. Take a picture or record a video to capture a key moment.
- b. Take a picture or record a video and send it to a colleague by email to ask for advice.
- c. Use the App Patients to load the patient's exams and check them during the surgical intervention.
- d. What additional applications do you think it might have?

**Could you perform the actions mentioned above? Yes/No**

**Do you think the SmartGlass may be useful in the surgery room?**

|   |   |   |   |   |   |   |   |   |    |
|---|---|---|---|---|---|---|---|---|----|
| 1 | 2 | 3 | 4 | 5 | 6 | 7 | 8 | 9 | 10 |
|---|---|---|---|---|---|---|---|---|----|

## Outpatient care

**The SmartGlass can be eventually used in the following situations during an outpatient visit:**

- a. Take a picture or record a video of a peculiar lesion.
- b. Use the App Diagnose to browse an algorithm during an outpatient visit.
- c. What additional applications do you think SmartGlass can have?

**Could you perform the actions mentioned above? Yes/No**

**Do you think the SmartGlass may be useful in outpatient care?**

|   |   |   |   |   |   |   |   |   |    |
|---|---|---|---|---|---|---|---|---|----|
| 1 | 2 | 3 | 4 | 5 | 6 | 7 | 8 | 9 | 10 |
|---|---|---|---|---|---|---|---|---|----|

## General features

**How would you improve the App you used?**

- App Patients (surgery room):
- App Diagnose (consult):

**How would you improve the SmartGlass?**

**In which of the previously mentioned situations do you think SmartGlass can be more useful?**

**Please, describe you optimal App**

**Additional comments**
